# Supplementary material for: Nuclear ADP-ribosylation drives IFNγ-dependent STAT1α enhancer formation in macrophages
Source: PubMed Central journal article supplement (PMC8225886; doi:10.1038/s41467-021-24225-2), 2021-06-24
Supplement: 41467_2021_24225_MOESM2_ESM.pdf [file 41467_2021_24225_MOESM2_ESM.pdf]

## **Description of Additional Supplementary Files**

File Name: Supplementary Data 1

Description: Mass spectrometry data for STAT1 $\alpha$  ADPRylation site identification.
